# Supplementary material
Source: publisher site journal article supplement (https://www.dovepress.com/article/288732)
Supplement: Supplementary file 1 [file get_supplementary_file.php]

Supplementary Table 1 Cut off value, sensitivity, and specificity of MAGGIC risk score for the detection of 2-year all-cause mortality, 1-year and 2-year rehospitalization due to heart failure

|  | 2-year all-cause mortality | | |  | 1-year rehospitalization due to heart failure | | |  | 2-year rehospitalization due to heart failure | | |
| --- | --- | --- | --- | --- | --- | --- | --- | --- | --- | --- | --- |
|  | Cut off value | sensitivity | specificity |  | Cut off value | sensitivity | specificity |  | Cut off value | sensitivity | specificity |
| MAGGIC risk score | 22 | 0.714 | 0.634 |  | 24 | 0.581 | 0.771 |  | 20 | 0.705 | 0.571 |

MAGGIC: Meta-analysis Global Group in Chronic Heart Failure

Supplementary Table 2 Relationship between left ventricular remodeling parameters 1-year change and MAGGIC risk score in dilated cardiomyopathy patients (N=104) in 1-year follow-up

|  | MAGGIC risk score | |
| --- | --- | --- |
|  | r | P |
| 1-year change in LAD (%) | 0.097 | 0.325 |
| 1-year change in LVEDD (%) | 0.305 | 0.002 |
| 1-year change in LVEF (%) | -0.186 | 0.159 |

LAD: left atrial diameter; LVEDD: left ventricular end-diastolic diameter; LVEF: left ventricular ejection fraction; MAGGIC: Meta-analysis global group in chronic heart failure

Supplementary Table 3 Cut off value, sensitivity, and specificity of MAGGIC risk score for the detection of left ventricular remodeling in 1-year follow-up

|  | 1-year left ventricular remodeling | | |
| --- | --- | --- | --- |
|  | Cut off value | sensitivity | specificity |
| MAGGIC risk score | 29 | 0.364 | 0.914 |

MAGGIC: Meta-analysis Global Group in Chronic Heart Failure

Supplementary Table 4 Intra-observer variability tests for echocardiography parameters (N=23)

|  | Mean bias ± SD | ICC | COV(%) |
| --- | --- | --- | --- |
| LAD (mm) | 0.00±4.60 | 0.95 | 3.56 |
| LVEDD (mm) | 0.90±4.90 | 0.94 | 2.82 |
| LVEF (%) | 0.40±7.20 | 0.94 | 8.60 |

COV: coefficient of variation; ICC: intra-class correlation coefficient; LAD: left atrial diameter; LVEDD: left ventricular end-diastolic diameter; LVEF: left ventricular ejection fraction

Supplementary Figure 1. Comparison of left heart remodeling parameters between dilated cardiomyopathy patients at baseline and at 1-year follow-up (N = 104). LAD, left atrial diameter; LVEDD, left ventricular end-diastolic diameter; LVEF, left ventricular ejection fraction





Supplementary Figure 2. Comparison of 1-year change in LAD, LVEDD, and LVEF between two groups of MAGGIC risk score in dilated cardiomyopathy patients (N = 104). LAD, left atrial diameter; LVEDD, left ventricular end-diastolic diameter; LVEF, left ventricular ejection fraction; MAGGIC, Meta-Analysis Global Group in Chronic Heart Failure; M1–M2: MAGGIC risk score of all dilated cardiomyopathy patients divided into two groups by median.
